# Supplementary material
Source: PubMed Central journal article supplement (PMC9236191)
Supplement: NIHMS1775439-supplement-Supp_Materials.pdf [file NIHMS1775439-supplement-Supp_Materials.pdf]

**Supplementary information**

---

**Genomic frontiers in congenital heart disease**

---

In the format provided by the authors and unedited

Supplementary Table 1 | **Damaging variants identified in 132 definitive and candidate CHD-associated genes reported in CHD and control cohorts<sup>1,2</sup>**

| Gene name       | Control cohorts |                        |                       |         | CHD cohort |                        |                       |         |
|-----------------|-----------------|------------------------|-----------------------|---------|------------|------------------------|-----------------------|---------|
|                 | gnomAD          |                        | SFARI                 |         | PCGC       |                        |                       |         |
|                 | Rare LOF        | Rare damaging missense | Damaging missense DNV | LOF DNV | Rare LOF   | Rare damaging missense | Damaging missense DNV | LOF DNV |
| <i>AGPS</i>     | 6               | 80                     | 0                     | 0       | 0          | 9                      | 1                     | 0       |
| <i>AKAP6</i>    | 22              | 8                      | 0                     | 0       | 5          | 0                      | 0                     | 0       |
| <i>AMBRA1</i>   | 11              | 106                    | 0                     | 0       | 1          | 10                     | 0                     | 1       |
| <i>ANK3</i>     | 29              | 142                    | 0                     | 0       | 4          | 5                      | 0                     | 2       |
| <i>ANKRD11</i>  | 10              | 9                      | 0                     | 0       | 1          | 0                      | 0                     | 6       |
| <i>ATG2A</i>    | 37              | 1                      | 0                     | 0       | 4          | 0                      | 0                     | 0       |
| <i>ATP8B2</i>   | 19              | 153                    | 0                     | 0       | 0          | 11                     | 0                     | 0       |
| <i>CACNA1C</i>  | 22              | 318                    | 0                     | 0       | 0          | 20                     | 2                     | 0       |
| <i>CACNA1H</i>  | 45              | 722                    | 0                     | 0       | 0          | 39                     | 3                     | 0       |
| <i>CAD</i>      | 43              | 466                    | 0                     | 0       | 3          | 27                     | 3                     | 0       |
| <i>CDK13</i>    | 15              | 10                     | 0                     | 0       | 1          | 3                      | 6                     | 1       |
| <i>CHD4</i>     | 18              | 285                    | 0                     | 0       | 0          | 13                     | 7                     | 0       |
| <i>CHD7</i>     | 7               | 274                    | 0                     | 0       | 12         | 17                     | 4                     | 15      |
| <i>CLUH</i>     | 21              | 175                    | 1                     | 0       | 0          | 17                     | 4                     | 0       |
| <i>COL1A2</i>   | 16              | 300                    | 0                     | 0       | 0          | 17                     | 0                     | 0       |
| <i>COL4A3BP</i> | 13              | 14                     | 0                     | 0       | 3          | 1                      | 0                     | 0       |
| <i>CTNNB1</i>   | 2               | 29                     | 0                     | 0       | 3          | 2                      | 0                     | 3       |
| <i>CYFIP1</i>   | 33              | 11                     | 0                     | 0       | 4          | 1                      | 0                     | 0       |
| <i>DGKD</i>     | 27              | 118                    | 0                     | 0       | 0          | 11                     | 1                     | 0       |
| <i>FAM135A</i>  | 38              | 65                     | 0                     | 0       | 5          | 2                      | 0                     | 0       |
| <i>FARSB</i>    | 21              | 39                     | 0                     | 0       | 3          | 5                      | 1                     | 0       |
| <i>FBN1</i>     | 13              | 465                    | 1                     | 0       | 0          | 30                     | 3                     | 0       |
| <i>FBN2</i>     | 37              | 739                    | 0                     | 0       | 5          | 36                     | 2                     | 1       |
| <i>FLT4</i>     | 10              | 119                    | 0                     | 0       | 12         | 9                      | 1                     | 2       |
| <i>FRYL</i>     | 58              | 31                     | 0                     | 2       | 8          | 3                      | 0                     | 3       |
| <i>GANAB</i>    | 20              | 157                    | 0                     | 0       | 1          | 11                     | 2                     | 1       |
| <i>GATA4</i>    | 7               | 121                    | 0                     | 0       | 2          | 9                      | 0                     | 2       |
| <i>HDAC7</i>    | 11              | 12                     | 0                     | 0       | 3          | 0                      | 0                     | 1       |
| <i>JAG1</i>     | 6               | 179                    | 0                     | 0       | 5          | 14                     | 1                     | 3       |
| <i>JAG2</i>     | 7               | 159                    | 0                     | 0       | 0          | 15                     | 1                     | 0       |
| <i>KAT6B</i>    | 13              | 217                    | 0                     | 0       | 1          | 15                     | 0                     | 2       |
| <i>KMT2A</i>    | 4               | 366                    | 0                     | 0       | 1          | 13                     | 2                     | 5       |
| <i>KMT2B</i>    | 19              | 204                    | 0                     | 0       | 0          | 14                     | 0                     | 1       |
| <i>KMT2D</i>    | 22              | 416                    | 0                     | 0       | 12         | 30                     | 6                     | 15      |
| <i>LAMA5</i>    | 83              | 156                    | 0                     | 0       | 7          | 8                      | 1                     | 0       |
| <i>LRP1</i>     | 18              | 755                    | 1                     | 0       | 0          | 42                     | 4                     | 0       |

|                 |     |      |   |   |    |    |    |   |
|-----------------|-----|------|---|---|----|----|----|---|
| <i>LRP5</i>     | 38  | 491  | 1 | 0 | 0  | 24 | 0  | 0 |
| <i>MACF1</i>    | 107 | 397  | 0 | 0 | 0  | 21 | 0  | 0 |
| <i>MAPK8IP3</i> | 11  | 26   | 0 | 0 | 3  | 2  | 0  | 0 |
| <i>NF1</i>      | 55  | 137  | 0 | 0 | 4  | 10 | 1  | 0 |
| <i>NOTCH1</i>   | 9   | 297  | 0 | 0 | 12 | 34 | 4  | 4 |
| <i>NSD1</i>     | 9   | 380  | 1 | 0 | 4  | 22 | 5  | 8 |
| <i>PIAS3</i>    | 8   | 8    | 0 | 0 | 3  | 0  | 0  | 0 |
| <i>PLXND1</i>   | 20  | 29   | 0 | 0 | 4  | 3  | 0  | 0 |
| <i>PTPN11</i>   | 3   | 76   | 0 | 0 | 0  | 20 | 17 | 0 |
| <i>RBFOX2</i>   | 6   | 5    | 0 | 0 | 3  | 1  | 0  | 3 |
| <i>RYR2</i>     | 65  | 951  | 0 | 0 | 5  | 49 | 2  | 0 |
| <i>RYR3</i>     | 77  | 1186 | 1 | 0 | 5  | 51 | 4  | 2 |
| <i>SCN5A</i>    | 23  | 540  | 2 | 0 | 0  | 27 | 2  | 0 |
| <i>SLIT3</i>    | 34  | 162  | 0 | 0 | 1  | 11 | 1  | 1 |
| <i>SMAD2</i>    | 3   | 60   | 0 | 0 | 1  | 10 | 4  | 2 |
| <i>SMARCC1</i>  | 13  | 22   | 0 | 0 | 6  | 2  | 0  | 0 |
| <i>SOS1</i>     | 5   | 99   | 0 | 0 | 0  | 9  | 5  | 0 |
| <i>SPTBN1</i>   | 13  | 90   | 0 | 0 | 1  | 10 | 0  | 1 |
| <i>SSH2</i>     | 17  | 10   | 0 | 0 | 3  | 0  | 0  | 0 |
| <i>TAB2</i>     | 2   | 17   | 0 | 0 | 1  | 0  | 0  | 4 |
| <i>TBX18</i>    | 1   | 88   | 0 | 0 | 1  | 10 | 0  | 1 |
| <i>TBX5</i>     | 2   | 69   | 0 | 0 | 3  | 5  | 1  | 1 |
| <i>TCF12</i>    | 32  | 23   | 0 | 1 | 5  | 0  | 1  | 1 |
| <i>TENM4</i>    | 16  | 518  | 0 | 0 | 4  | 19 | 2  | 0 |
| <i>TMTC2</i>    | 21  | 89   | 0 | 1 | 0  | 8  | 0  | 0 |
| <i>TNS1</i>     | 28  | 409  | 0 | 0 | 0  | 22 | 1  | 0 |
| <i>TSC1</i>     | 12  | 187  | 0 | 0 | 1  | 14 | 1  | 1 |
| <i>UBAP2</i>    | 58  | 1    | 0 | 0 | 5  | 0  | 0  | 0 |
| <i>WHSC1</i>    | 7   | 190  | 0 | 0 | 1  | 11 | 1  | 2 |
| <i>ZMIZ1</i>    | 6   | 24   | 0 | 0 | 3  | 4  | 0  | 2 |
| <i>KDR</i>      | 16  | 111  | 0 | 0 | 5  | 9  | 0  | 0 |
| <i>BCAR1</i>    | 15  | 3    | 0 | 0 | 3  | 0  | 0  | 0 |
| <i>PLEKHO1</i>  | 13  | 4    | 0 | 0 | 3  | 0  | 0  | 0 |
| <i>SMAD5</i>    | 4   | 62   | 0 | 1 | 0  | 11 | 1  | 0 |
| <i>KMT2E</i>    | 24  | 371  | 1 | 0 | 0  | 20 | 1  | 0 |
| <i>COL27A1</i>  | 38  | 294  | 0 | 0 | 0  | 19 | 1  | 0 |
| <i>FOXO1</i>    | 0   | 126  | 0 | 0 | 0  | 10 | 1  | 0 |
| <i>SOS2</i>     | 15  | 95   | 0 | 0 | 3  | 4  | 1  | 0 |
| <i>CHD8</i>     | 12  | 179  | 0 | 0 | 0  | 12 | 1  | 0 |
| <i>CLSPN</i>    | 34  | 2    | 0 | 0 | 4  | 0  | 0  | 0 |
| <i>CLCN7</i>    | 29  | 120  | 0 | 0 | 0  | 8  | 1  | 0 |
| <i>ABCA2</i>    | 28  | 257  | 0 | 0 | 0  | 17 | 2  | 0 |

|                 |    |     |   |   |   |    |   |   |
|-----------------|----|-----|---|---|---|----|---|---|
| <i>ADNP</i>     | 3  | 9   | 0 | 0 | 0 | 0  | 0 | 4 |
| <i>INO80</i>    | 6  | 261 | 0 | 0 | 0 | 14 | 1 | 0 |
| <i>ITPR1</i>    | 24 | 410 | 0 | 0 | 0 | 21 | 2 | 0 |
| <i>DYRK1A</i>   | 9  | 1   | 0 | 0 | 0 | 0  | 0 | 3 |
| <i>LTBP4</i>    | 42 | 237 | 0 | 0 | 0 | 18 | 1 | 0 |
| <i>TCF7L2</i>   | 11 | 212 | 0 | 0 | 0 | 12 | 0 | 1 |
| <i>SOX13</i>    | 11 | 127 | 0 | 0 | 0 | 9  | 1 | 0 |
| <i>ANKHD1</i>   | 18 | 33  | 0 | 0 | 4 | 1  | 0 | 0 |
| <i>ARHGAP29</i> | 20 | 9   | 0 | 0 | 3 | 0  | 0 | 0 |
| <i>ATL2</i>     | 15 | 72  | 0 | 0 | 3 | 5  | 0 | 0 |
| <i>ATP13A1</i>  | 13 | 92  | 1 | 0 | 2 | 11 | 0 | 0 |
| <i>ATP2B1</i>   | 7  | 165 | 0 | 0 | 0 | 13 | 0 | 0 |
| <i>ATP2C1</i>   | 13 | 76  | 0 | 0 | 0 | 9  | 0 | 0 |
| <i>COL11A1</i>  | 34 | 418 | 1 | 0 | 4 | 23 | 0 | 0 |
| <i>COL3A1</i>   | 12 | 224 | 0 | 0 | 0 | 20 | 0 | 0 |
| <i>COL6A1</i>   | 23 | 190 | 0 | 0 | 4 | 8  | 0 | 0 |
| <i>COPS6</i>    | 4  | 7   | 0 | 0 | 3 | 1  | 0 | 0 |
| <i>CTDP1</i>    | 17 | 11  | 0 | 0 | 3 | 1  | 0 | 0 |
| <i>MEGF8</i>    | 54 | 42  | 0 | 0 | 6 | 2  | 0 | 0 |
| <i>EIF6</i>     | 8  | 30  | 0 | 0 | 3 | 1  | 0 | 0 |
| <i>ENAH</i>     | 14 | 113 | 0 | 0 | 0 | 8  | 0 | 0 |
| <i>FAM160A2</i> | 23 | 1   | 0 | 0 | 3 | 0  | 0 | 0 |
| <i>FBLN1</i>    | 23 | 140 | 0 | 0 | 0 | 9  | 0 | 0 |
| <i>GNA12</i>    | 13 | 80  | 0 | 0 | 0 | 9  | 0 | 0 |
| <i>GOT2</i>     | 13 | 61  | 0 | 0 | 0 | 8  | 0 | 0 |
| <i>HERC1</i>    | 44 | 180 | 0 | 0 | 2 | 14 | 0 | 0 |
| <i>PIK3C2B</i>  | 41 | 116 | 0 | 0 | 3 | 9  | 0 | 0 |
| <i>ITGB1</i>    | 22 | 119 | 0 | 0 | 0 | 8  | 0 | 0 |
| <i>KANK2</i>    | 14 | 24  | 0 | 0 | 3 | 0  | 0 | 0 |
| <i>KCNH2</i>    | 23 | 273 | 0 | 0 | 0 | 15 | 0 | 0 |
| <i>PTPRF</i>    | 24 | 18  | 1 | 0 | 0 | 8  | 0 | 0 |
| <i>QSER1</i>    | 20 | 0   | 0 | 0 | 5 | 0  | 0 | 0 |
| <i>KIF13A</i>   | 24 | 105 | 0 | 0 | 3 | 4  | 0 | 0 |
| <i>RAD54L2</i>  | 6  | 113 | 0 | 0 | 0 | 8  | 0 | 0 |
| <i>MAG11</i>    | 28 | 17  | 0 | 0 | 4 | 1  | 0 | 0 |
| <i>MBD6</i>     | 17 | 13  | 0 | 0 | 3 | 0  | 0 | 0 |
| <i>MESDC2</i>   | 20 | 2   | 0 | 0 | 3 | 0  | 0 | 0 |
| <i>SLC12A2</i>  | 18 | 224 | 1 | 0 | 3 | 13 | 0 | 0 |
| <i>MYO18A</i>   | 30 | 346 | 0 | 1 | 2 | 20 | 0 | 0 |
| <i>NFATC4</i>   | 21 | 27  | 0 | 0 | 3 | 1  | 0 | 0 |
| <i>NKX2-5</i>   | 6  | 52  | 0 | 0 | 3 | 2  | 0 | 0 |
| <i>NNT</i>      | 16 | 274 | 0 | 0 | 0 | 18 | 0 | 0 |

|                |    |     |   |   |   |    |   |   |
|----------------|----|-----|---|---|---|----|---|---|
| <i>PAN2</i>    | 24 | 12  | 0 | 0 | 4 | 0  | 0 | 0 |
| <i>USP25</i>   | 30 | 25  | 0 | 0 | 5 | 2  | 0 | 0 |
| <i>SLC4A2</i>  | 14 | 114 | 1 | 0 | 3 | 10 | 0 | 0 |
| <i>SIPA1L2</i> | 20 | 181 | 0 | 0 | 0 | 15 | 0 | 0 |
| <i>SMARCA4</i> | 11 | 120 | 0 | 0 | 0 | 8  | 0 | 0 |
| <i>SMURF1</i>  | 10 | 59  | 0 | 0 | 3 | 1  | 0 | 0 |
| <i>SSH1</i>    | 39 | 40  | 0 | 0 | 4 | 2  | 0 | 0 |
| <i>WDR70</i>   | 27 | 67  | 0 | 0 | 4 | 2  | 0 | 0 |
| <i>SULF1</i>   | 26 | 292 | 0 | 0 | 0 | 21 | 0 | 0 |
| <i>TCF7L1</i>  | 11 | 153 | 0 | 0 | 0 | 11 | 0 | 0 |
| <i>TMOD3</i>   | 15 | 34  | 0 | 0 | 3 | 2  | 0 | 0 |
| <i>ZC3H3</i>   | 24 | 15  | 0 | 0 | 3 | 1  | 0 | 0 |

CHD, congenital heart disease; DNV, de novo variant; gnomAD, Genome Aggregation Database; LOF, loss of function; PCGC, Pediatric Cardiac Genomics Consortium; SFARI, Simons Foundation for Autism Research Initiative.

## References

1. Jin, S. C. et al. Contribution of rare inherited and de novo variants in 2,871 congenital heart disease probands. *Nat. Genet.* **49**, 1593–1601 (2017).
2. Karczewski, K. J. et al. The mutational constraint spectrum quantified from variation in 141,456 humans. *Nature* **581**, 434–443 (2020).

Supplementary Table 2 | **Gene ontology terms associated with 132 definitive and candidate congenital heart disease-associated genes**

| Category        | Gene class (number)                                                | Gene ontology terms                                                     | Definitive and candidate genes                                                                                                                                                                                                                |
|-----------------|--------------------------------------------------------------------|-------------------------------------------------------------------------|-----------------------------------------------------------------------------------------------------------------------------------------------------------------------------------------------------------------------------------------------|
| Gene regulation | Chromatin modification (21)                                        | Chromosome organization                                                 | <i>CHD4, CHD7, CHD8, COPS6, CTNNB1, HDAC7, INO80, KAT6B, KMT2A, KMT2B, KMT2D, KMT2E, NSD1, RAD54L2, SMARCA4, SMARCC1, TCF7L1, TCF7L2, WDR70, WHSC1, ZMIZ1</i>                                                                                 |
|                 | Transcription factor (11)                                          | DNA-binding transcription factor activity                               | <i>ADNP, FOXO1, GATA4, NFATC4, NKX2-5, SMAD2, SMAD5, SOX13, TBX18, TBX5, TCF12</i>                                                                                                                                                            |
|                 | mRNA processing (7)                                                | mRNA processing, translation factor activity, RNA binding, mRNA binding | <i>CDK13, CLUH, DYRK1A, EIF6, PAN2, RBFOX2, ZC3H3</i>                                                                                                                                                                                         |
|                 | DNA binding (3)                                                    | DNA binding                                                             | <i>CLSPN, MBD6, MYO18A</i>                                                                                                                                                                                                                    |
| Signalling      | Extracellular matrix (12)                                          | Extracellular matrix                                                    | <i>COL11A1, COL1A2, COL27A1, COL3A1, COL4A3BP, COL6A1, FBLN1, FBNI, FBN2, LAMA5, LTBP4, SULF1</i>                                                                                                                                             |
|                 | Cilia (1)                                                          | Cilium                                                                  | <i>AMBRA1</i>                                                                                                                                                                                                                                 |
|                 | Cytoskeleton (18)                                                  | Cytoskeleton organization, cytoskeleton                                 | <i>ABCA2, ANK3, ATP2C1, BCAR1, CTDPI, CYFIP1, ENAH, ITGB1, KIF13A, LRP1, MACF1, NF1, SPTBN1, SSH1, SSH2, TMOD3, TNS1, TSC1</i>                                                                                                                |
|                 | Signal transduction (32)                                           | Signal transduction                                                     | <i>AKAP6, ARHGAP29, CACNA1C, DGKD, FLT4, GNA12, ITPR1, JAG1, JAG2, KANK2, KDR, LRP5, MAG11, MAPK8IP3, MEGF8, MESDC2, NOTCH1, PIAS3, PIK3C2B, PLXND1, PTPN11, PTPRF, RYR2, SIPA1L2, SLC12A2, SLIT3, SMURF1, SOS1, SOS2, TAB2, TENM4, UBAP2</i> |
| Other           | Ion binding, transmembrane transport, oxidoreductase activity (27) | None                                                                    | <i>AGPS, ANKHD1, ANKRD11, ATG2A, ATL2, ATP13A1, ATP2B1, ATP8B2, CACNA1H, CAD, CLCN7, FAM135A, FAM160A2, FARSB, FRYL, GANAB, GOT2, HERC1, KCNH2, NNT, PLEKH01, QSER1, RYR3, SCN5A, SLC4A2, TMTC2, USP25</i>                                    |
